# Supplementary material for: Radiation Therapy Patients’ Interest in Psychedelic-assisted Therapy: A Prospective Survey Study
Source: Research Square preprint supplement (doi:10.21203/rs.3.rs-6272209/v1), 2025-04-16
Supplement: Supplementary file 1 [file e91b7ee08a82f601d819429b.pdf]

| Characteristics (n = 100)        | Count (Percent)         |
|----------------------------------|-------------------------|
| Age (years)                      | 61 median (21-90 range) |
| Female                           | 37 (37%)                |
| Male                             | 63 (63%)                |
| Race                             |                         |
| White                            | 67 (67%)                |
| Asian                            | 13 (13%)                |
| Black                            | 3 (3%)                  |
| Other/Unknown                    | 17 (17%)                |
| Education                        |                         |
| Less than high school            | 4 (4%)                  |
| High school graduate             | 26 (26%)                |
| Associate degree                 | 7 (7%)                  |
| Bachelor's degree                | 37 (37%)                |
| Master's degree                  | 14 (14%)                |
| Doctorate degree                 | 12 (12%)                |
| Prior diagnosis of mood disorder | 29 (29%)                |
| Anxiety                          | 25 (25%)                |
| Depression                       | 17 (17%)                |
| PTSD, bipolar disorder, or other | 7 (7%)                  |
| History of psychedelic use       | 25 (25%)                |
| Psilocybin                       | 19 (19%)                |
| LSD                              | 15 (15%)                |
| MDMA                             | 8 (8%)                  |
| Ketamine                         | 3 (3%)                  |
| DMT/ayahuasca                    | 2 (2%)                  |
| Other                            | 9 (9%)                  |
| Primary Cancer                   |                         |
| Prostate                         | 23 (23%)                |
| Breast                           | 16 (16%)                |
| Head and neck                    | 15 (15%)                |
| Skin                             | 11 (11%)                |
| CNS                              | 8 (8%)                  |
| Gynecologic                      | 8 (8%)                  |
| Anorectal                        | 7 (7%)                  |
| Lung                             | 5 (5%)                  |
| Sarcoma                          | 4 (4%)                  |
| Lymphoma                         | 2 (2%)                  |
| Bladder                          | 1 (1%)                  |
| Survey Timing                    |                         |
| Before radiation                 | 48 (48%)                |
| During radiation                 | 24 (24%)                |
| After radiation                  | 28 (28%)                |
| Radiation Therapy                |                         |
| Definitive Intent                | 76 (76%)                |
| Palliative Intent                | 24 (24%)                |
